# Supplementary material
Source: HighWire-hosted journal article supplement (https://emj.bmj.com/content/40/6/407)
Supplement: inline-supplementary-material-2 [file inline-supplementary-material-2.pdf]

**Supplementary material 2: Screening and selection tool**

The following screening and selection tool was used by two independent reviewers during abstract and full-text review.

| <b>LUS in COVID-19: Screening and Selection Tool</b> |                                                                                                                                                                   |                                                                                                                                                                       |
|------------------------------------------------------|-------------------------------------------------------------------------------------------------------------------------------------------------------------------|-----------------------------------------------------------------------------------------------------------------------------------------------------------------------|
| <b>Reviewer name:</b>                                |                                                                                                                                                                   | <b>Date:</b>                                                                                                                                                          |
| <b>Title:</b>                                        |                                                                                                                                                                   |                                                                                                                                                                       |
| <b>Author name:</b>                                  | <b>Publication Date:</b>                                                                                                                                          | <b>Journal:</b>                                                                                                                                                       |
|                                                      | <b>Inclusion Criteria</b>                                                                                                                                         | <b>Exclusion Criteria</b>                                                                                                                                             |
| Diagnostic test:                                     | <input type="checkbox"/> LUS                                                                                                                                      |                                                                                                                                                                       |
| Population:                                          | <input type="checkbox"/> Age >16<br><input type="checkbox"/> Acute presentation of suspected COVID-19                                                             |                                                                                                                                                                       |
| Intervention:                                        | <input type="checkbox"/> Lung Ultrasound                                                                                                                          |                                                                                                                                                                       |
| Comparator:                                          | <input type="checkbox"/> CT<br><input type="checkbox"/> PCR<br><input type="checkbox"/> Final Diagnosis                                                           |                                                                                                                                                                       |
| Outcomes:                                            | <input type="checkbox"/> Diagnostic Accuracy                                                                                                                      |                                                                                                                                                                       |
| Study design:                                        | <input type="checkbox"/> Prospective<br><input type="checkbox"/> Retrospective<br><input type="checkbox"/> Experimental<br><input type="checkbox"/> Observational | <input type="checkbox"/> Case reports / series<br><input type="checkbox"/> Editorials<br><input type="checkbox"/> Recommendations<br><input type="checkbox"/> Reviews |
| Overall decision:                                    | <input type="checkbox"/> Included                                                                                                                                 | <input type="checkbox"/> Excluded                                                                                                                                     |
| <b>Notes:</b>                                        |                                                                                                                                                                   |                                                                                                                                                                       |
